# Supplementary material
Source: HighWire-hosted journal article supplement (http://www.qdcxjkg.com/highwire/filestream/114038/field_highwire_adjunct_files/0/ERJ-01537-2012_Disclosures.pdf)
Supplement: ERJ-01537-2012_Disclosures.pdf [file ERJ-01537-2012_Disclosures.pdf]

**S. Buist** has been or is a member of Advisory Boards for Merck, GSK, Novartis, Sepracor, has received unrestricted educational funds for the BOLD operations centre through the Kaiser Permanente Center for Health Research in Portland, Oregon, USA, and has received funding from Astra Zeneca to attend the Lund COPD Conference.

**M.A. McBurnie** has received funding for the BOLD study operations centre from unrestricted educational grants from GlaxoSmithKline, Pfizer, Boehringer Ingelheim, AstraZeneca, ALTANA, Novartis, Merck, Chiesi, Schering Plough, and Sepracor.

**R. Nielsen** has received research grants from Yara Praxair and GlaxoSmithKline; received fee for speaking from AstraZeneca, GlaxoSmithKline, Pfizer and Boehringer Ingelheim; travels to the ATS conference has been supported by GlaxoSmithKline; travels to the ERS conference has been supported by GlaxoSmithKline, AstraZeneca, Boehringer Ingelheim and Pfizer.

**M. Studnicka** has received funds for research, in the past 5 years, from: Astra-Zeneca, Boehringer-Ingelheim, GSK, MSD and Novartis. He has received fees for speaking or reimbursement for attending a symposium in the past 5 years from: Astra-Zeneca, Boehringer-Ingelheim, GSK, Novartis and Nycomed.
